# Supplementary material for: Insight into the Mechanism of Interactions between the LL-37 Peptide and Model Membranes of Legionella gormanii Bacteria
Source: MDPI journal article supplement (doi:10.3390/ijms241512039), 2023-07-27
Supplement: s1 [file s1]

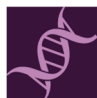

Supplementary Data

# Insight into the Mechanism of Interactions between the LL-37 Peptide and Model Membranes of *Legionella gormanii* Bacteria

Katarzyna Pastuszek <sup>1</sup>, Bożena Kowalczyk <sup>2</sup>, Jacek Tarasiuk <sup>2</sup>, Rafał Luchowski <sup>3</sup>, Wiesław I. Gruszecki <sup>3</sup>, Małgorzata Jurak <sup>1,\*</sup> and Marta Palusinska-Szys <sup>2</sup>

<sup>1</sup> Department of Interfacial Phenomena, Institute of Chemical Sciences, Faculty of Chemistry, Maria Curie-Skłodowska University, Maria Curie-Skłodowska Sq. 3, 20-031 Lublin, Poland; katarzyna.pastuszek@mail.umcs.pl

<sup>2</sup> Department of Genetics and Microbiology, Institute of Biological Sciences, Faculty of Biology and Biotechnology, Maria Curie-Skłodowska University, Akademicka 19, 20-033 Lublin, Poland; b.kowalczyk746@wp.pl (B.K.); jacek.tarasiuk@mail.umcs.pl (J.T.); marta.palusinska-szys@mail.umcs.pl (M.P.-S.)

<sup>3</sup> Department of Biophysics, Institute of Physics, Faculty of Mathematics, Physics and Informatics, Maria Curie-Skłodowska University, Radziszewskiego 10, 20-031 Lublin, Poland; rafal.luchowski@mail.umcs.pl (R.L.); wieslaw.gruszecki@mail.umcs.pl (W.I.G.)

\* Correspondence: malgorzata.jurak@mail.umcs.pl

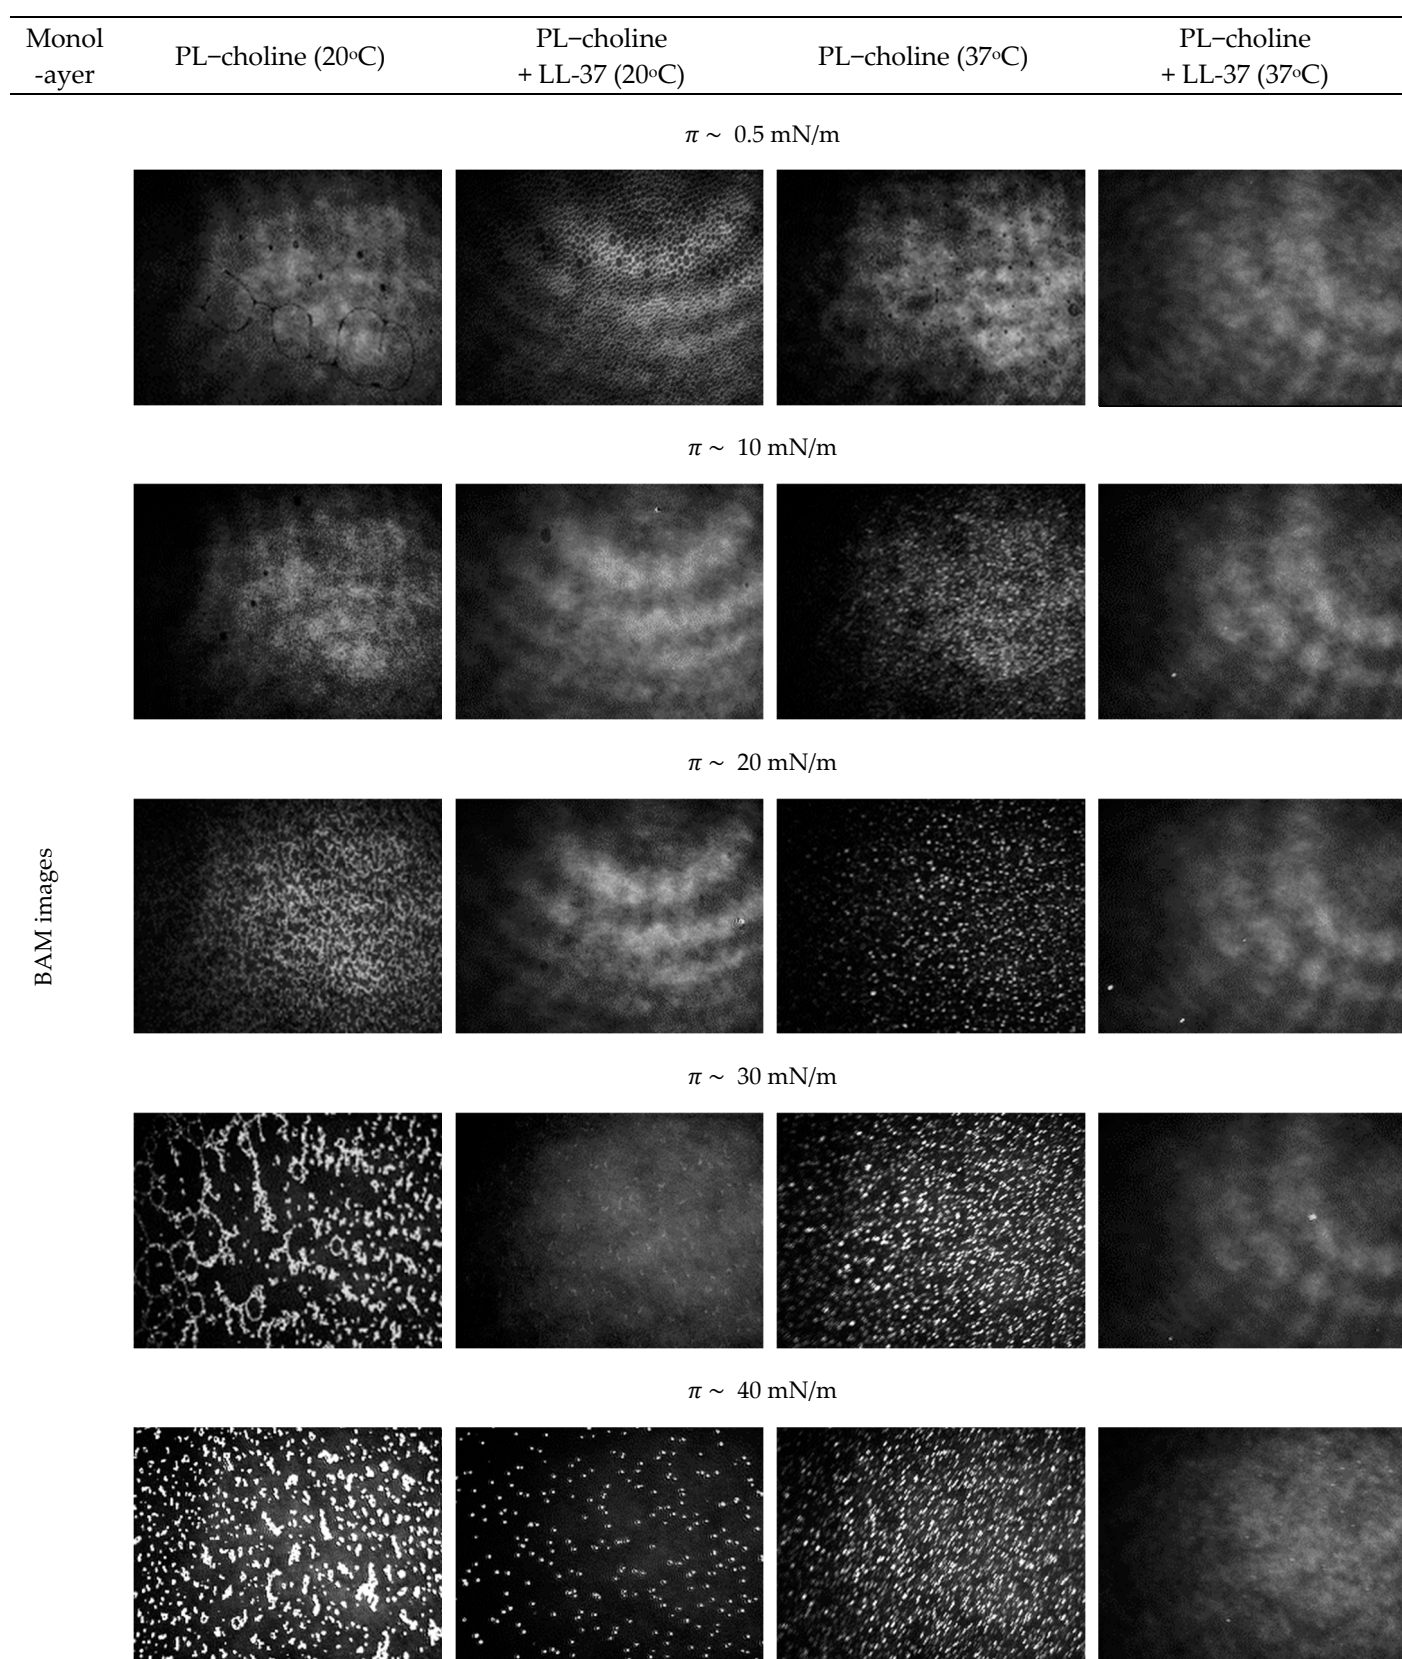

**Figure S1.** BAM images ( $720 \mu\text{m} \times 400 \mu\text{m}$ ) taken for the monolayers composed of phospholipids isolated from the *L. gormanii* bacteria cultured on the non-supplemented choline (PL-choline) medium, in the presence or absence of the LL-37 peptide at 20°C or 37°C.

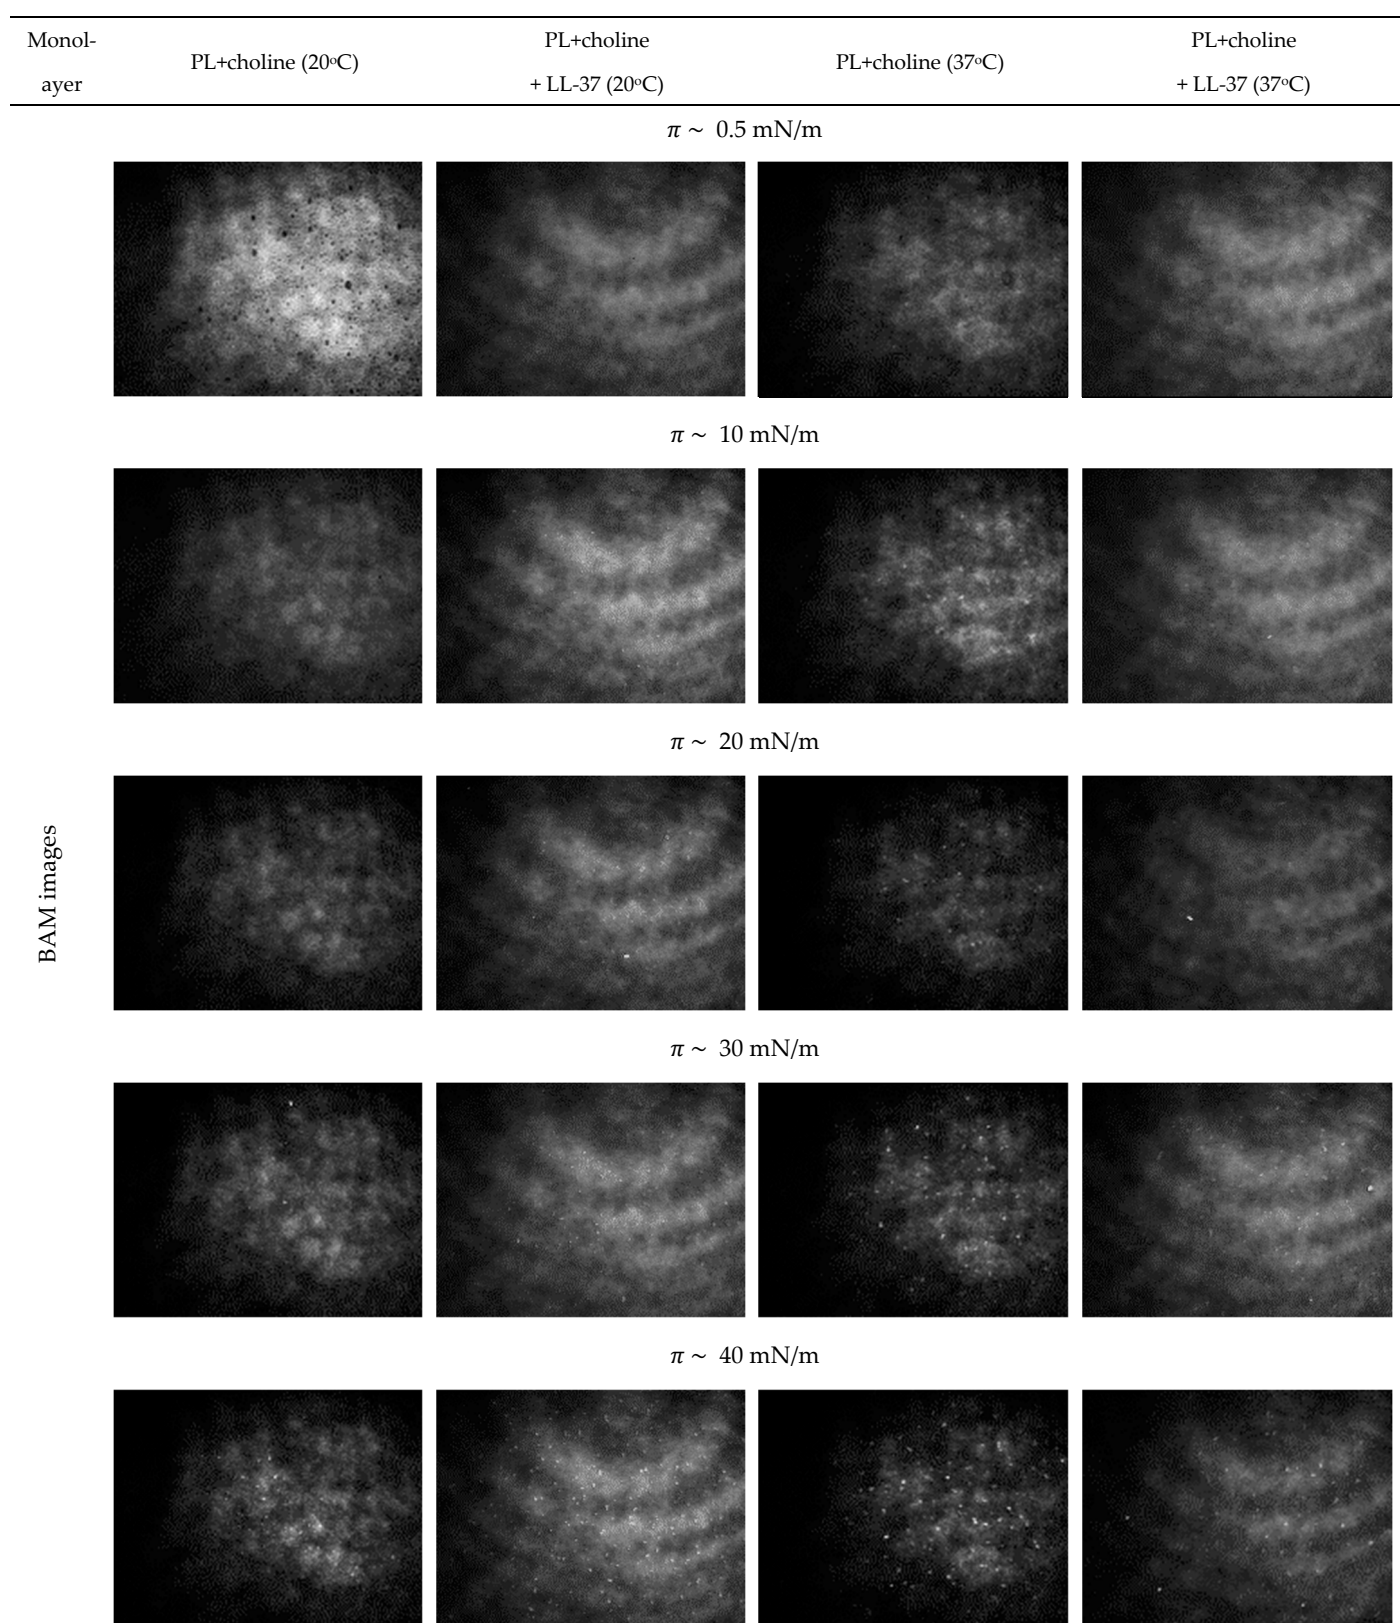

**Figure S2.** BAM images ( $720 \mu\text{m} \times 400 \mu\text{m}$ ) taken for the monolayers composed of phospholipids isolated from the *L. gormanii* bacteria cultured on the choline supplemented (PL+choline) medium, in the presence or absence of the LL-37 peptide at 20°C or 37°C.
